# Supplementary material
Source: PubMed Central journal article supplement (PMC2575709)
Supplement: JCI0836157sd.pdf [file JCI0836157sd.pdf]

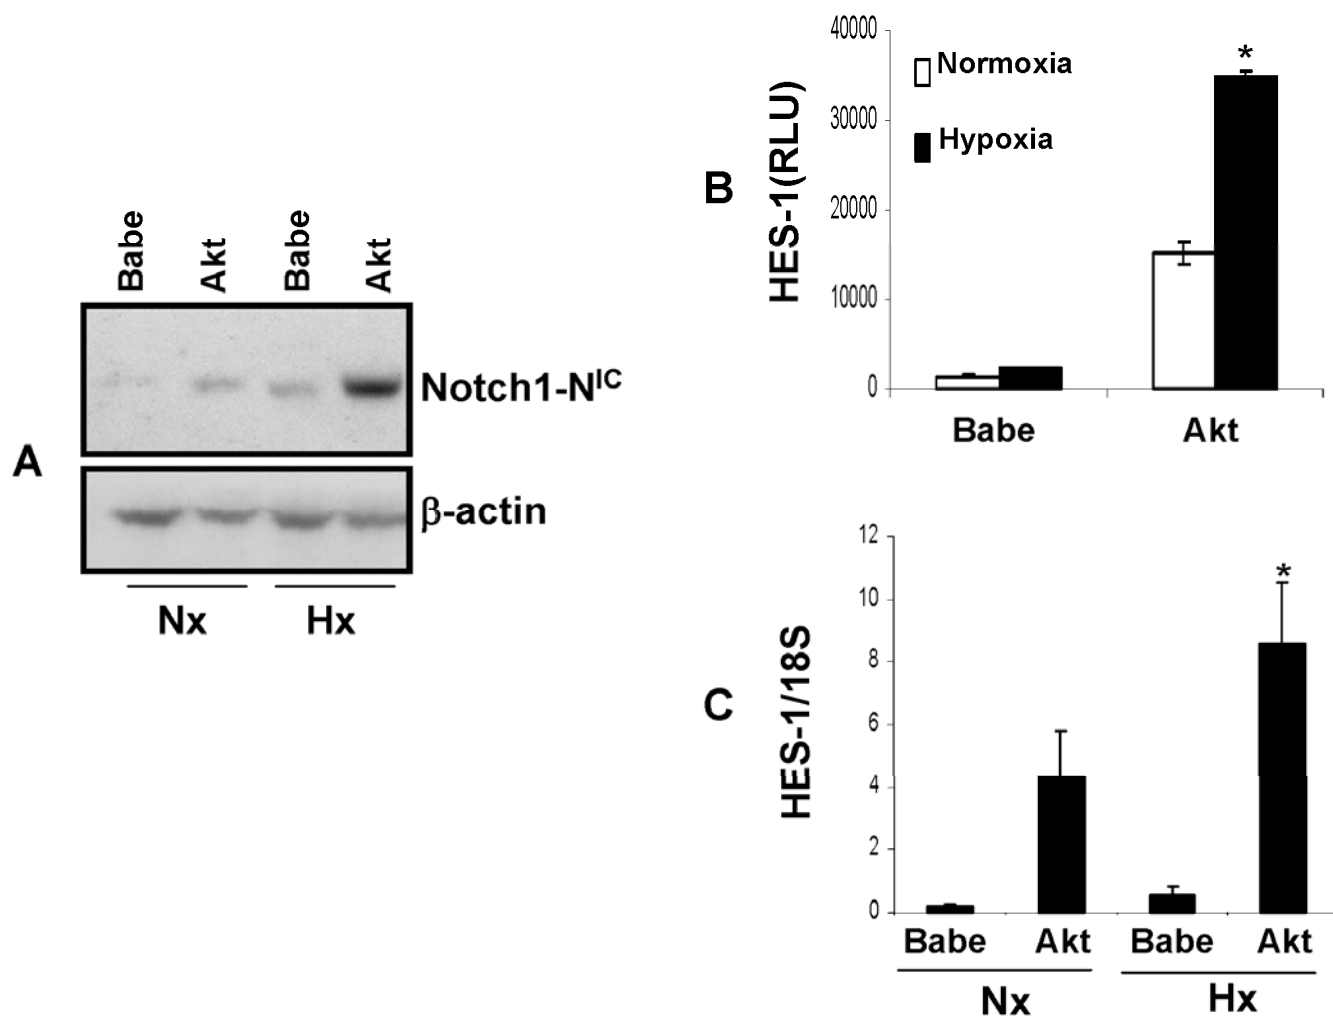

**Supplementary Figure 1: Induction of Notch1 signaling in hypoxia.** **A)** Western blot analysis of pBabe and Akt expressing melanocytes for Notch1-N<sup>IC</sup> in hypoxia (2% O<sub>2</sub>) compared to normoxia (20% O<sub>2</sub>). **B)** HES1-reporter activity in pBabe and Akt expressing cells. **C)** HES1 expression in pBabe and Akt cells in normoxia and hypoxia measured by qRT-PCR. 18S serves as internal control to normalize the expression levels of the target gene. Results in B and C are the mean  $\pm$  SD ( $p < 0.05$ , Student's *t* test).

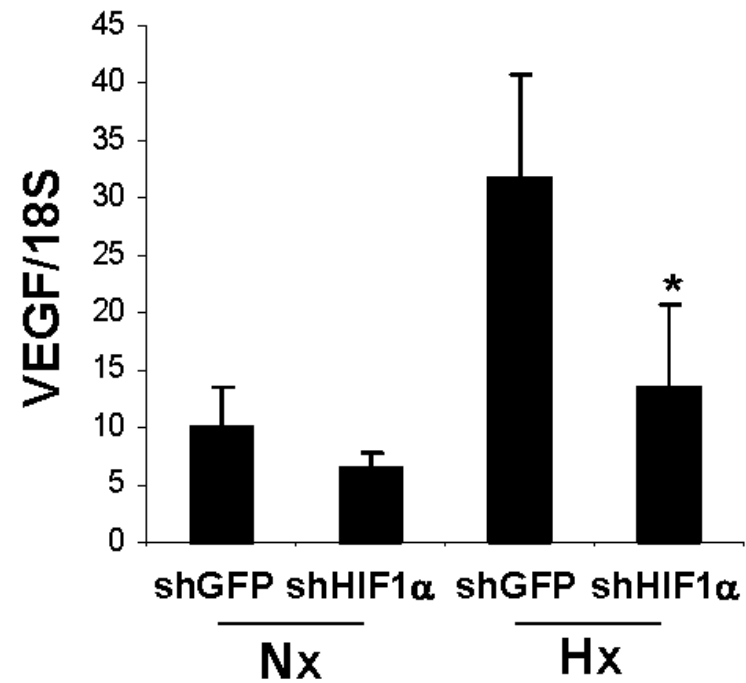

**Supplementary Figure 2:** Hypoxia treatment of Akt melanocytes expressing shGFP or shHIF1α. VEGF expression normalized to 18S was used to measure inhibition of HIF-1α by shHIF-1α in normoxia and 2% O<sub>2</sub>. Result is the mean ± SD (p<0.05%, Student's *t* test).

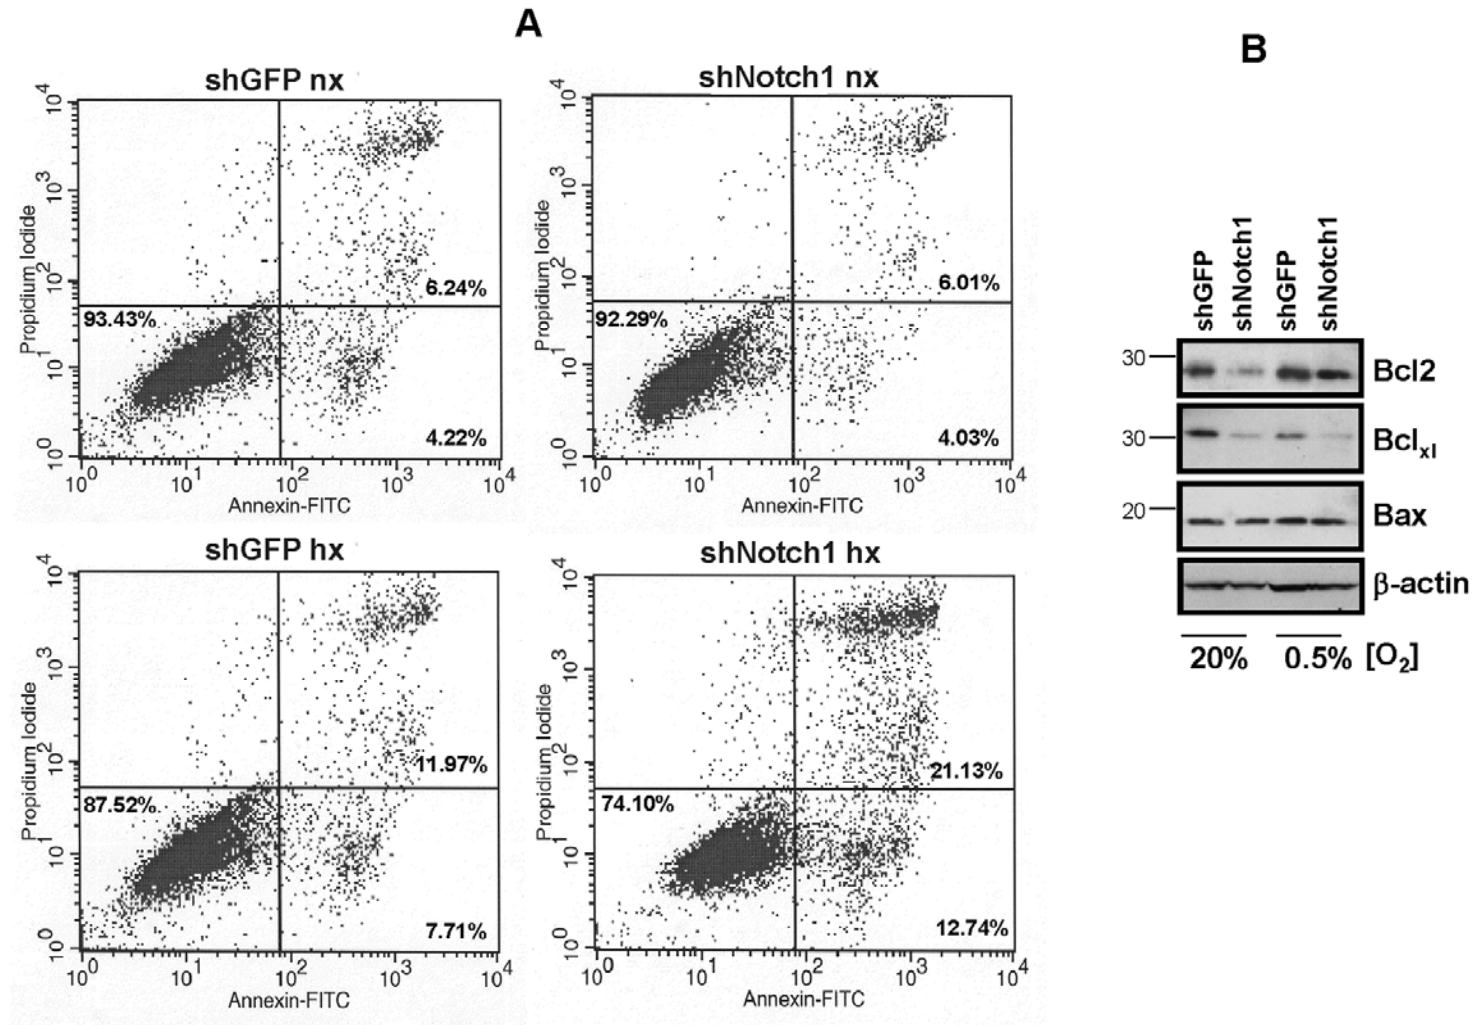

**Supplementary Figure 3: Inhibition of Notch1 expression results in cell death.** **A)** Flow cytometry profiles for Annexin V/PI staining of cells expressing an shRNA against Notch1 or an shGFP after exposure to normoxia or 0.5% O<sub>2</sub> for 48 hours. **B)** Western blot analysis for the anti-apoptotic proteins Bcl<sub>XL</sub> and Bcl<sub>2</sub> and the pro-apoptotic protein Bax in Akt melanocytes expressing an shGFP or an shRNA against Notch1 and exposed to normoxia or 0.5% O<sub>2</sub> for 48 hours. β-actin was used as loading control.

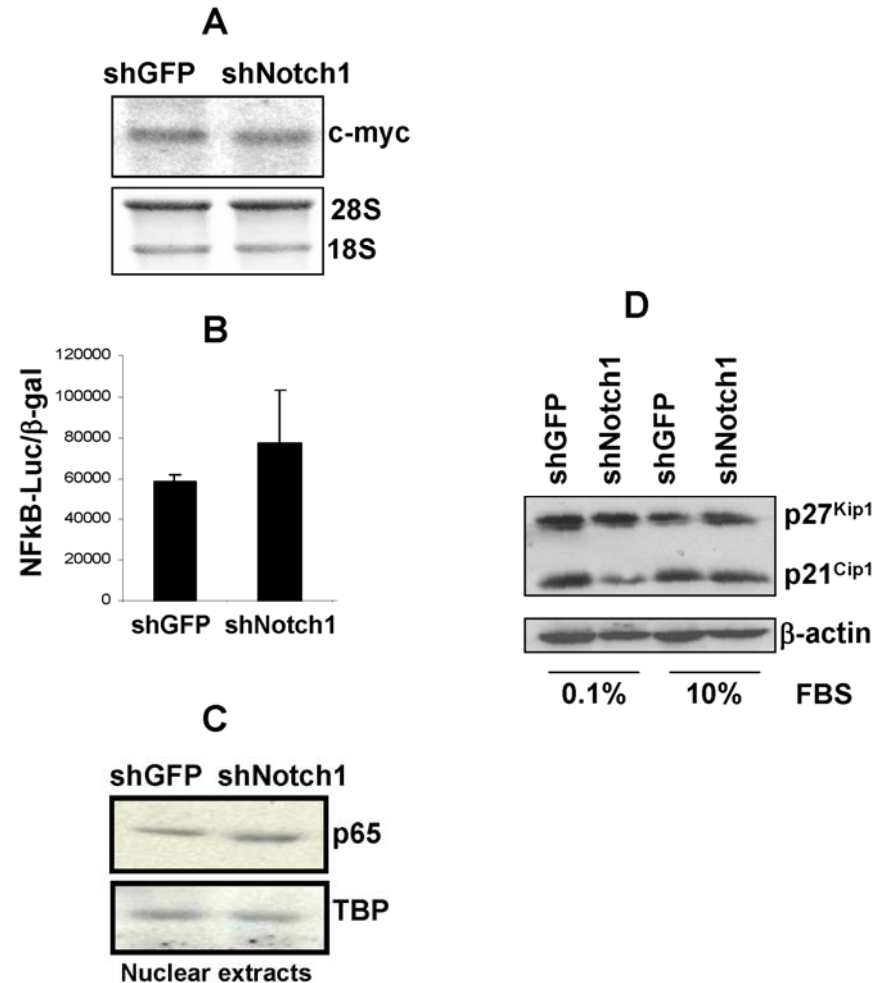

**Supplementary Figure 4:** *Notch1* knock-down does not inhibit *c-myc*, *NFkB*, *p21* or *p27*. **A)** Northern blot analysis of cells expressing shGFP and shNotch1 probed with *c-myc*. 28S and 18S were used as loading controls. **B)** *NFkB* reporter activity in cells expressing a shGFP or shNotch1 **C)** Western blot on nuclear lysates for p65 protein. TBP was used as loading control. **D)** Western blot for p21<sup>Cip1</sup> and p27<sup>Kip1</sup> in shGFP and shNotch1 expressing cells. β-actin was used as loading control.
